1 Automated Threshold Determination of Auditory Evoked Brainstem Responses by  
2 Cross-correlation Analysis with Varying Sweep Number

3

4 Haoyu Wang<sup>1,4</sup>, Bei Li<sup>1</sup>, Xu Ding<sup>2,3</sup>, Xueling Wang<sup>1-3</sup>, Zhiwu Huang<sup>1-3</sup>, Yunfeng  
5 Hua<sup>2-4</sup>, Lei Song<sup>1-3</sup>, Hao Wu<sup>1-4</sup>

6

7 <sup>1</sup>Department of Otolaryngology-Head and Neck Surgery, Shanghai Ninth People's  
8 Hospital, Shanghai Jiao Tong University School of Medicine, Shanghai, China

9 <sup>2</sup>Ear Institute, Shanghai Jiao Tong University School of Medicine, Shanghai, China

10 <sup>3</sup>Shanghai Key Laboratory of Translational Medicine on Ear and Nose Diseases,  
11 Shanghai, China

12 <sup>4</sup>Shanghai Institute of Precision Medicine, Shanghai Ninth People's Hospital,  
13 Shanghai, China

14

15 Haoyu Wang and Bei Li contributed equally to this work.

16 *Correspondence to:* Yunfeng Hua, Lei Song and Hao Wu, Shanghai Ninth People's  
17 Hospital, 115 Jinzun Road, 200125 Shanghai, China.

18 Email: [yunfeng.hua@shsmu.edu.cn](mailto:yunfeng.hua@shsmu.edu.cn), [lei.song@yale.edu](mailto:lei.song@yale.edu), [wuhao@shsmu.edu.cn](mailto:wuhao@shsmu.edu.cn)

19

20

21 **ABSTRACT**

22 Auditory brainstem response (ABR) is widely employed to evaluate the hearing  
23 function, both in clinics and basic research. Despite many attempts for automation  
24 over decades, reliable determination of threshold stimulus level still relies on human  
25 visual identification of waveform, which oftentimes is subjective. Here, we report a  
26 robust procedure for automatic and accurate threshold determination in both mouse  
27 and human ABR. Contrary to prior approaches, in our new threshold determination  
28 algorithm, the on-going averaging is stopped once the waveform is confirmed by a  
29 cross-correlation time shift approach. The flexible ending sweep numbers for different  
30 stimuli is used to inform the threshold determination. We found a good match of the  
31 threshold readings between the algorithm and the human judges. Moreover, in the  
32 algorithm, smaller sweep number is required for strong response from supra-threshold  
33 level, and thus a considerable portion of sweeps can be saved in comparison to the  
34 case with level averaging of a fix number. These features are attractive and  
35 implementation of this method in commercial devices will make the ABR test  
36 procedure more objective and efficient.

37

38 **Keywords:** auditory brainstem response, threshold determination, cross-correlation,  
39 automation

## 40 INTRODUCTION

41 The auditory brainstem responses (ABRs) are brain electrical potential changes due to  
42 synchronous neuronal activities evoked by supra-threshold acoustic stimuli (Jewett et  
43 al., 1970). These responses are detectable using non-invasive surface electrodes  
44 placed on the scalp of the test subject, and thereby widely employed to assess the  
45 hearing function. In rodents and cats, typical ABR waveform is composed of initial  
46 five peaks in the early onset of sound evoked potentials, followed by broader, later  
47 waves that represent synchronous activities arising from projections along the  
48 auditory ascending pathway including auditory nerve, cochlear nucleus, superior  
49 olivary complex, lateral lemniscus and inferior colliculus, respectively (Henry, 1979;  
50 Melcher et al., 1996), whereas in human slightly different peak generators were  
51 demonstrated with intracranial recordings (Moller and Jannetta, 1983) and  
52 neuromagnetic responses (Parkkonen et al., 2009). Thus, features like ABR wave  
53 latencies and amplitudes provide clinical-significant information, for instance site of  
54 lesions or tumors in the auditory system (Lewis et al., 2015; Roeser et al., 2007) based  
55 on how the properties of waveforms are altered.

56 Although the ABR is an objective measurement, at near-threshold the waveform  
57 recognition involves human interpretation. Currently, professionals are still required  
58 to supervise recording and visually identify the obtained waveforms which is labor-  
59 intensive. Besides, such interpretations oftentimes are subjective and can introduce  
60 errors that vary from person to person. When bias due to the skill and the experience  
61 of the interpretators is involved, the variation is not trivial, especially for cases with  
62 untypical waveform or high background noise (Vidler and Parkert, 2004). As precise  
63 and objective measurement of small hearing threshold elevation became critical for  
64 diagnosis of progressive hearing loss (Barreira-Nielsen et al., 2016), hidden hearing

65 loss (Kujawa and Liberman, 2009; Mehraei et al., 2016; Ridley et al., 2018;  
66 Sergeyenko et al., 2013), age-related hearing loss (Gates and Mills, 2005; Sergeyenko  
67 et al., 2013) and tinnitus (Bramhall et al., 2018; Castaneda et al., 2019), automated  
68 approaches with high precision and reliability are in demand to objectify the ABR  
69 threshold determination. Over decades, many attempts were made including: (1)  
70 quantification of the waveform similarity by comparison to existing templates (Davey  
71 et al., 2007; Elberling, 1979; Valderrama et al., 2014) as well as based on features  
72 learned by artificial neural network (Alpsan and Ozdamar, 1991; McKearney and  
73 MacKinnon, 2019) from human annotated datasets; (2) quantification of the  
74 waveform stability by cross-correlation function between single-sweeps (Bershad and  
75 Rockmore, 1974; Weber and Fletcher, 1980), interleaved responses (Berninger et al.,  
76 2014; Xu et al., 1995) or responses at adjacent stimulus levels (Suthakar and  
77 Liberman, 2019); (3) the ‘signal quality’ through scoring procedures like F-ratios  
78 (Cebulla et al., 2000; Don and Elberling, 1994; Elberling and Don, 1984; Sininger,  
79 1993). Due to inconsistencies in waveform and signal-to-noise-ratio (SNR)  
80 introduced by differences in test subject conditions, electrode placement and  
81 impedance, as well as acquisition settings, the accurate threshold determination is  
82 only possible under a narrow range of experimental settings, hampering direct  
83 comparisons of ABR data and results across laboratories.

84 In this study, we proposed a novel approach which detects time-locked ABR  
85 waveforms via a time shift cross-correlation approach during on-going sweep  
86 averaging. Sweep averaging is terminated upon reaching a criterion for a detectable  
87 waveform at different stimulus levels and the threshold estimation was also carried  
88 out by the algorithm. The collected results were validated by human experts on the  
89 same mouse or human subjects. To verify, the total numbers of sweeps (as an

90 indicator of test duration) were compared between cases in the algorithm and with a

91 fixed sweep number for level averaging and prove the algorithm effective.

92

## 93 MATERIALS AND METHODS

### 94 Animals, Human Participants and Ethics

95 C57BL/6 mice were purchased from Sino-British SIPPR/BK Lab Animal Ltd.  
96 (Shanghai, China). The telomerase-knock-out mice were kindly donated by Prof. Lin  
97 Liu (Nankai University, China) and bred in house. Human participants were recruited  
98 from Shanghai Ninth People's Hospital and consent forms were signed before the  
99 experiment. This study was conducted at the Ear Institute and the Hearing and Speech  
100 Center of the hospital. All procedures were reviewed and approved by the Institutional  
101 Authority for Laboratory Animal Care (HKDL2018503) and the Hospital Ethics  
102 Committee for Medical Research (SH9H-2019-T79-1).

103

### 104 ABR Recording

105 Mouse ABRs were recorded via a TDT RZ6/BioSigRZ system (Tuck-Davis Tech.  
106 Inc., US) in a sound-proof chamber as previously described (Lin et al., 2019). In brief,  
107 7-week-old mice were anesthetized through intraperitoneal injection of Chloral  
108 hydrate (500 mg/kg). During the recording, animal body temperature was maintained  
109 at 37 °C using a regulated heating pad (Harvard Apparatus, US) with a rectal thermal  
110 probe placed under the animal's body. Evoked potentials were registered via  
111 subdermal needle electrodes (Rochester Electro-Med. Inc., US) placed at the animal's  
112 vertex (active electrode), left infra-auricular mastoid (reference electrode) and right  
113 shoulder region (ground electrode). 3-ms tone pips at 16 kHz were delivered via an  
114 MFI speaker (Tuck-Davis Tech. Inc., US) positioned in the front 10 cm from the  
115 animal's vertex. Acoustic stimuli were presented 20 stimuli per second and the evoked  
116 potentials were sampled at 24 kHz. Artifact rejection level was set at < 35 % (mean  
117 rejection voltage 20.5  $\mu$ V). Sound level series were acquired starting from 90 to 0 dB

118 SPL (sound pressure level) with 5-dB step size. For one animal, the stimulus level  
119 series were repeated from +10 to -10 dB SPL around the estimated threshold with 1-  
120 dB step size (Fig. 3B).

121 Human ABRs were recorded by a commercial ABR device (Intelligent Hearing  
122 Systems, US) with Smart EP software from four volunteers aged 21-29 years without  
123 the knowledge of their medical conditions. Click sound stimulation (100  $\mu$ s duration,  
124 rectangular envelopes) was generated and presented monaurally through ER3 insert  
125 earphones with foam tips. Stimuli were presented at a rate of 37.1/s with alternating  
126 polarity. Electrode impedance was  $< 5$  k $\Omega$  and inter-electrode impedance was within  
127  $\pm 1$  k $\Omega$ . The artifact rejection level was  $< 31\%$  (rejection voltage 31  $\mu$ V) to exclude  
128 contaminations from EEG and myogenic potentials. The evoked potentials were  
129 collected with 40 kHz sampling rate and  $\times 100,000$  amplification. The bandpass filter  
130 was set at 100 - 3000 Hz. Average responses over 500, 1000, and 2000 sweeps were  
131 acquired and repeated three times for the level series starting from 60 to 0 dB SPL  
132 with 5-dB step size.

133

### 134 Cross-correlation Analysis in Mouse ABR

135 Sweeps were randomly subdivided into two groups. Cross-correlation operations  
136 (MATLAB Central File Exchange Function *xcorr*, MathWorks, US) were applied to  
137 subgroup averages. The result of this operation yielded the correlation coefficient as a  
138 function of time shift between two signals (ABR subgroup averages). The time shift  
139 (signal lag) of the maximal coefficient was used to judge the reproducibility of ABRs.  
140 As the responses are time-locked to the acoustic stimuli, a neglectable time shift is  
141 expected. In this study, maximum allowed lag ( $L$ ) for a true waveform was within one  
142 data point from time zero (equivalent to  $\pm 0.042$  ms, 1 % of the analyzed temporal

143 window) due to system sampling error. As noise peaks could also coincidentally  
144 overlapped within the desired time shift, three parallel cross-correlation runs with  
145 regrouped sweeps were implemented and false positives were rejected upon  
146 inconsistent lag values. In addition, the correlation coefficient peak amplitude was  
147 included as an independent variable (Fig. 2C).

148 At each stimulus level, averaging with increasing sweep numbers was iterated  
149 and the ending sweep number was noted upon a detectable response by the cross-  
150 correlation approach described above. Each iteration consists of 50 sweeps and the  
151 upper limit was set to include seven iterations (350 sweeps). The estimated threshold  
152 was just above the stimulus level at which the upper iteration limit was reached. A  
153 more precise threshold determination was done by modeling the change of the ending  
154 sweep numbers upon level series. For that both sigmoidal (1) and exponential  
155 functions (2) were employed to fit the relationship between the normalized iteration  
156 count  $C'$  and the stimulus level  $S$  using a nonlinear least square method in MATLAB  
157 (MathWorks, US). In the functions,  $\alpha_1 = 0.6$  and  $\alpha_2 = 0.25$  were fixed for calibrated  
158 lag criterion ( $L = 1$ ), while  $\beta_1$  and  $\beta_2$  were obtained by fitting. The estimated threshold  
159 was the corresponding  $S$  with the sigmoidal function value of 0.9 or the exponential  
160 function value of 1.0.

161 *Sigmoid model:*  $C'(S) = \frac{1}{1+e^{\alpha_1(S-\beta_1)}} \quad (1)$

162 *Exponential model:*  $C'(S) = e^{-\alpha_2(S-\beta_2)} \quad (2)$

163

## 164 Cross-correlation Analysis in Human ABR

165 For human ABR, average responses were recorded sequentially and used as inputs in  
166 the algorithm with minor modification (Fig. S3). Instead of regrouping single sweeps  
167 as in the mouse ABR, the three combinations of two out of three average responses



168 ( $E\{A\}$ ,  $E\{B\}$ ,  $E\{C\}$  in Fig. S3) were used for the parallel cross-correlation runs to  
169 reject false positives caused by noise peaks. When the lag condition is not fulfilled,  
170 averages over more sweeps (with a step size of 500) were used for further iterations  
171 until the upper limit of 3500 was reached. The average responses over 500, 1000 and  
172 2000 sweeps were recorded, whereas responses over 1500, 2500, 3000 and 3500  
173 sweeps could be obtained by weighted averaging (3) where  $E\{m\}$ ,  $E\{n\}$  and  $E\{m +$   
174  $n\}$  denote the time averages over  $m$ ,  $n$  and  $m + n$  sweeps, respectively.

$$175 \quad E\{m + n\} = \frac{m \cdot E\{m\} + n \cdot E\{n\}}{m + n} \quad (3)$$

176 The maximum allowed lag ( $L$ ) for a true response was within seven data points from  
177 time zero (equivalent to  $\pm 0.175$  ms, 2 % of the analyzed temporal window). The  
178 estimated threshold was the lowest level with a detectable waveform.

179

## 180 Visual identification of ABR Threshold by Human Judges

181 To estimate the ground-truth thresholds of the recorded mouse and human ABRs, five  
182 clinicians were asked to independently assess the average responses and report the  
183 visually identified thresholds. The identities of the test subjects were blinded to the  
184 judges. The average responses of all level series were provided, of which either  
185 constant number of sweeps (the conventional averaging) or ending number  
186 determined by the algorithm (the algorithm termination averaging) was used. The  
187 thresholds were determined by three out of five execution judges (with the highest  
188 and the lowest value excluded) and used to evaluate the accuracy of the algorithm  
189 outcomes.

## 190 RESULTS

### 191 Cross-Correlation Analysis in On-going Averaging

192 ABRs are embedded in high-level background activities and system noise. Smooth  
193 baseline and clear waveform, if present, are obtained usually after averaging over  
194 hundreds of sweeps. The required number of sweeps in averaging, however, not only  
195 depends on the amplitude of the evoked response but also varies between test subjects  
196 due to variations in, for instance, skull sizes, electrode impedances and placement that  
197 determined the distances from the generator, how far reach the electrode pick up the  
198 far-field signals and the angles of the vector projections. Within an ABR recording  
199 session, these experimental parameters are fixed and the SNR of recorded sweeps  
200 between stimulus levels can be quantitatively compared. It is expected that weak  
201 response evoked by low level stimulus requires more sweeps to average than those  
202 strong responses from high level stimuli to reach similar SNR level, whereas  
203 averaging fails to improve the SNR when a response is absent. Based on this fact, we  
204 designed a novel procedure to estimate the threshold stimulus level by monitoring the  
205 change in sweep number which is required for the average response to reach a stable  
206 SNR level.

207 In detail, recorded sweeps at a test stimulus level were randomly divided into two  
208 groups (Fig. 1, yellow boxes) and cross-correlation coefficients (CCs) were computed  
209 between two subgroup averages (Fig. 1, green boxes). Time-locked ABR waveform,  
210 irrespective of wave latencies and amplitudes, are detected by specifying a maximum  
211 allowed time shift ( $L$ ; Fig. 1, magenta boxes) within which these subgroup averages  
212 are maximum overlapped (peak of the obtained CC). In addition, three parallel runs  
213 with regrouped sweeps are used (Fig. 1, red box) so that the false waves from  
214 randomly overlapped noise peaks of similar latencies can be rejected. Next, these

215 iteration steps repeat along with the increase of sweep number (Fig. 1, the inner loop),  
216 until either a true waveform is confirmed (consistent smaller lag than L) or the upper  
217 limit of iteration count (N) is reached. Here the iteration count limit is needed to avoid  
218 nonproductive attempts in the cases where waveforms are absent. Finally, the outer  
219 loop (Fig. 1) is implemented to scan the responses with decreasing stimulus levels. In  
220 this study, we start with 90 dB SPL in mice and 60 dB SPL in humans with a step size  
221 of 5 dB. The stop command was triggered upon a second attempt with exceeded  
222 iteration count, but the function was idled during initial optimization.

223

#### 224 Threshold Determination in Mouse ABR

225 To test whether the algorithm could determine the threshold automatically, we  
226 recorded single-sweep ABR sets from eight mice (three wild-type adult C57BL/6  
227 mice of normal hearing and five telomerase knock-out mice with age-related  
228 progressive hearing threshold elevation). The raw sweeps were corrected through a  
229 smoothing spline fit to remove baseline fluctuations (Fig. S1) before being processed  
230 by the algorithm.

231 As illustrated in Fig. 2A, an averaged mouse ABR waveform level series is  
232 plotted with the threshold of 30 dB SPL determined by human judges. Subgroup  
233 averages (Fig. 2B) were produced in the algorithm to compute the CCs. The obtained  
234 CC peak amplitudes (Fig. 2C) and corresponding signal lags (Fig. 2D) were plotted  
235 versus stimulus levels. With reducing stimulus level, the CC peak amplitude decreases  
236 monotonically, whereas the lags at supra-threshold levels are constantly within one  
237 data point (equivalent to a time shift of  $\pm 0.042$  ms from time zero). This result  
238 suggests that the cross-correlation time shift is more sensitive to the responses at near-  
239 threshold levels than the CC, thus justified its use in our algorithm.

240 We then determine whether the algorithm could use the ending sweep number to  
241 inform the threshold level. To enable rapid threshold determination by reducing the  
242 total number of test iterations, batches of 50 sweeps were added into the subgroup  
243 averaging by iterations until stable waveforms are reached. As shown in Fig. 2E, the  
244 iteration count (proportional to the ending sweep number) remained low at high  
245 stimulus levels but increases dramatically at near-threshold levels and reached its  
246 maximum at sub-threshold levels. Besides, we found consistent results were obtained  
247 within a large range of the allowed lag (Fig. S2A) and the maximum ending sweep  
248 number (Fig. S2B), suggesting that the new method works without fine-tuning the  
249 detection parameter.

250 Further attempts were made to model the iteration count for precise threshold  
251 determination between the lowest supra-threshold and the highest sub-threshold level.  
252 A sigmoidal function was employed to fit the normalized iteration counts (Fig. 3A). In  
253 order to determine the corresponding function value at the true threshold level, from  
254 one animal we acquired an ABR set with peri-threshold level series of 1-dB step size  
255 (Fig. 3B). Both exponential and sigmoidal functions were used to model the change.  
256 Note that for the exponential fit only data points at supra-threshold levels were used  
257 due to early cut-off by the maximum iteration count. The lowest supra-threshold level  
258 was found when the best-fitted exponential growth reached 1.0 or  $\sim 0.9$  in the sigmoid  
259 growth (Fig. 3B). As fitting with sigmoid function does not require additional data  
260 exclusion, it was used to obtain the mouse threshold results for further validation of  
261 the method.

262

## 263 Threshold Determination in Human ABR

264 To test whether the new method was compatible with human ABR, we acquired ABR

265 sets from four human participants. Because export of single-sweep data was not an  
266 option on the commercial device we used, alternatively we use average responses  
267 over different pre-set sweep numbers (see Fig. S3 for the variant of the algorithm  
268 block diagram; see MATERIALS AND METHODS for more details). Averages (Fig.  
269 4A) as well as subgroup averages (Fig. 4B) are shown at decreasing stimulus levels  
270 (60 dB to 0 dB SPL).

271 The CC peak amplitudes and the corresponding signal lags were plotted versus  
272 the stimulus levels (Fig. 4C and 4D). The sweep number increment was 500 per  
273 iteration and the upper limit was 3500 sweeps (at iteration count of seven). Note that  
274 we allowed slightly larger lag value (seven data points, equivalent to a time shift of  $\pm$   
275 0.175 ms from time zero) for a true waveform because a broader waveform is  
276 expected for human ABR evoked by click-sound than that of mouse ABR. As shown  
277 in Fig. 4E, the iteration count increases fast to reach its maximum near the visually  
278 identified threshold level.

279

## 280 Comparison between Expert and Algorithm Determined Threshold

281 To validate the new method, we asked five human experts to independently assess the  
282 same ABR sets and compared the visually identified thresholds to those determined  
283 by the algorithm (Table 1). Scatterplots of the algorithm determined thresholds versus  
284 the visually identified thresholds showed no significant difference for both mouse and  
285 human ABR (Fig. 5A and Fig. 5C), suggesting a reliable threshold determination by  
286 our algorithm. Besides, matched thresholds were also obtained when average  
287 responses were generated with the ending sweep numbers from the algorithm (Fig.  
288 S4A and S4B). This result suggests that extensive averaging at supra-threshold levels  
289 does not improve the detection accuracy, and thus including a large number of the

290 sweep recording is unnecessary. We then compared the total sweep number used in  
291 two averaging methods, one with a constant sweep number (350 for mouse and 3500  
292 for human ABR) at all stimulus levels and the other with varying sweep number based  
293 on the response detection in the algorithm. We found in algorithm a reduction of  
294  $66.76 \pm 4.09$  % and  $53.08 \pm 12.91$  % (mean  $\pm$  s.d.) of number of sweeps needed in  
295 mouse and human ABR, respectively (Fig. 5B and Fig. 5D).

296

297 **DISCUSSION**

298 Over decades several statistical approaches have been proposed to automate and  
299 objectify the ABR analysis. The cross-correlation approach has two advantages. First,  
300 high intra-subject waveform stability in both ABR wave latencies and amplitudes  
301 leads to the robust waveform which can be detected by cross-correlation analysis with  
302 high sensitivity. Second, it is template-free and not subject to the influence of large  
303 inter-subject waveform variability which is often presented in template-based  
304 approaches. However, prior attempts of the cross-correlation approach detect the ABR  
305 waveform with a decision boundary for a true response, for instance, minimum CC  
306 (Berninger et al., 2014; Bershada and Rockmore, 1974; Suthakar and Liberman, 2019;  
307 Weber and Fletcher, 1980) or maximum latency shift (Galbraith and Brown, 1990; Xu  
308 et al., 1995). Even with the same experimental settings, uniform SNR across  
309 recordings is not always guaranteed due to variabilities in skull size, electrode  
310 impedance and placement, as well as different sweep number used for averaging by  
311 individual experimenter. Thus, it is unlikely that calibrated decision boundary can be  
312 simply applied to another dataset without introducing detection error (in our hands up  
313 to 20 dB SPL, data not shown), limiting the application in cases like cross-institution  
314 collaboration efforts where data poolings are needed.

315 In contrast, our approach determines the threshold based on the relative change in  
316 the contribution of sweeps to the SNR of average response at different stimulus  
317 levels. The cross-correlation time shift approach has proven to be a reliable tool to  
318 detect the time-locked ABR waveform with high sensitivity, but in principle, it can be  
319 replaced in the algorithm by other quantifications like CC peak amplitude or  $F_{sp}$  (data  
320 not shown). The origin of the observed fast increase in the iteration count at near-  
321 threshold levels (Fig. 2E and Fig. 3E) is the compensation of a gradually reduced

322 response amplitude by noise suppression through averaging. As this increase reflects  
323 relative SNR change in the responses evoked by different stimulus strengths within  
324 subject, it is therefore rather insensitive to the inter-subject system variability.  
325 Besides, the new approach was proven not heavily rely on fine-tuning of the detection  
326 parameters. First, large difference in the obtained signal lags between sub- and supra-  
327 threshold levels (Fig. 2D) allows the lag selection from a large range without affecting  
328 the waveform detection (Fig. S2A). Second, the elevation of the maximum iteration  
329 count (proportional to the sweep number increase) causes little shift to the estimated  
330 threshold level when above certain value (Fig. S2B) as a result of its fast increase  
331 with reducing stimulus levels (Fig. 3B),

332       Next, we showed that precise threshold determination beyond the step size of  
333 level sampling was possible by modeling the sweep number change (Fig. 3B), in our  
334 case up to 1 dB in mouse ABR. Similar attempt was also made with human ABR sets,  
335 but a reliable model could not be established due to poor model fitting. Further  
336 development of this approach is to combine with level sampling strategy like  
337 progressively reduced step size (Cebulla and Sturzebecher, 2015) and increased  
338 sweep number per iteration at near-threshold levels, so that more effective data points  
339 can be used for model fitting.

340       In both mouse and human ABR, the new method was proven reliable in threshold  
341 determination with a maximum discrepancy of  $\pm 5$  dB to those provided by human  
342 experts. The average responses over varying sweep numbers seemed not to introduce  
343 additional difficulty in the threshold determination (Fig. 5B and Fig. 5E). That is  
344 because at the near-threshold levels, where the SNR of responses are critical for the  
345 threshold determination, an increasing number of sweeps were averaged, whereas at  
346 the supra-threshold levels the requirement of level averaging is low. Such feature is



347 attractive in two respects. First, it provides minimal quality control for unambiguous  
348 waveform recognition for both humans and algorithms. Such standardized data will  
349 benefit machine-learning-based approaches by minimizing annotation discrepancy in  
350 the training data (McKearney and MacKinnon, 2019). Second, when to stop  
351 averaging is an important decision during ABR recording (Don and Elberling, 1996;  
352 Madsen et al., 2018), the new method makes the ABR test more efficient by avoiding  
353 prolonged acquisition and redundant recordings.

354 **ACKNOWLEDGMENT**

355 We would like to thank Y. Li, K. Han, Y. Ren, L. Yang and H. Li from Shanghai Ninth  
356 People's Hospital for help with ABR assessment; Drs. G. Chen and L. Liu for  
357 providing *terc*<sup>-/-</sup> mice. This study was supported by the National Science Foundation  
358 for Young Scientists of China (81800901 to Y.H. and 81700903 to B.L.).

359

360 **COMPLIANCE WITH ETHICAL STANDARDS**

361 *Conflict of Interest* The authors declare that they have no competing interests.

362

363 **FIGURE LEGENDS**

364 **FIG 1.** Flowchart of our algorithm for automatic threshold determination. The  
365 stimulus level starts with 90 dB SPL and the initial iteration count is one. The input is  
366 50 sweeps recorded from a test subject. They are subdivided into two groups with  
367 corresponding subgroup averages  $E\{A\}$  and  $E\{B\}$  in each of three parallel runs  
368 (yellow boxes). Cross-correlation operation ( $xcorr$ ) is applied to the subgroup  
369 averages (green boxes) and the obtained signal lags of the CC peaks are compared  
370 with the allowed time shift ( $L = 1$  data point for mouse ABR; C1 to C3, magenta  
371 boxes). In cases when C1 to C3 are all true, the procedure starts over with lower  
372 stimulus level (red line, the outer loop), otherwise it iterates at the same stimulus level  
373 with more sweeps added (the inner loop, cyan line; 50 sweeps per iteration) until the  
374 maximum iteration count ( $N = 7$  for mouse ABR) is reached, indicating a sub-  
375 threshold level.

376

377 **FIG 2.** Threshold determination by cross-correlation analysis in mouse ABR. **A**  
378 Example average responses over 350 sweeps were recorded from a mouse. The  
379 visually identified threshold level (bolded) was about 30 dB SPL. **B** Two subgroup  
380 averages were used in the algorithm for cross-correlation analysis. **C** Peak amplitude  
381 of the computed CCs was plotted as a function of the level series. **D** Signal lag of the  
382 CC peak vs. level function was plotted. At supra-threshold levels (dots) the mean  
383 signal lags from three parallel runs were close to time zero ( $0.28 \pm 0.46$  data points,  
384 mean  $\pm$  s.d.), whereas significant large variability ( $30.50 \pm 22.51$  data points, mean  $\pm$   
385 s.d.) was constantly observed at sub-threshold levels (cycles). **E** Plot of the count of  
386 executed iterations vs. level function. Responses that were evoked by supra-threshold  
387 stimuli (black dots) require different number of iterations to converge lags within a

388 desired time shift ( $L \leq 1$  data point). After two consecutive aborts at maximum  
389 iteration count ( $N = 7$ , dash line), a detectable waveform was considered absent at the  
390 applied stimulus level (cycles) and stop command will be triggered to avoid  
391 nonproductive attempts at lower levels (triangles).

392

393 **FIG 3.** Precise threshold determination by modeling the change in iteration count  
394 with stimulus level. **A** The normalized iteration count vs. level function is fit by  
395 sigmoid function (red line). The best-fit function is used to estimate the threshold by  
396 level interpolation at 0.9 of the sigmoid growth. **B** Validation of the level interpolation  
397 with a dataset of 1-dB spaced stimulus level. The normalized iteration count vs. level  
398 function is fit by both sigmoid and exponential functions. The experimentally  
399 determined threshold is approximately at the level which corresponds to 1.0 of the  
400 best-fit exponential growth and 0.9 of the sigmoid growth.

401

402 **FIG 4.** Threshold determination by cross-correlation analysis in human ABR. **A**  
403 Example average responses over 3500 sweeps were recorded from a human  
404 participant with the visually identified threshold of 5 dB (bolded). **B** Subgroup  
405 averages were used in the algorithm for the cross-correlation analysis. **C** CC peak  
406 amplitude was plotted as a function of the level series. **D** Signal lag of the CC peak  
407 vs. level function was plotted. At supra-threshold levels (dots) the mean signal lags  
408 from three parallel runs were close to time zero ( $1.85 \pm 2.45$  data points, mean  $\pm$  s.d.),  
409 whereas large variability ( $22.67 \pm 23.01$  data points, mean  $\pm$  s.d.) were constantly  
410 observed at sub-threshold levels (cycles). **E** Plot of the executed iteration count vs.  
411 level function. The supra-threshold responses converge lags within seven data points  
412 from time zero after finite number of iterations (black dots).

413

414 **FIG 5.** Comparisons between the thresholds determined by the algorithm and human  
415 judges. **A** For mouse ABR close matches between the algorithm determined  
416 thresholds and those agreed by three out of five human experts (maximum and mean  
417 discrepancies, 4 dB and  $2.00 \pm 1.13$  dB, mean  $\pm$  s.d.). Linear fit: adjust  $R^2 = 0.97$ . **B**  
418 Comparison between the total sweeps used in the conventional level averaging with a  
419 fixed number (left bar) and in our method with varying sweep numbers at different  
420 levels (right bar). The latter requires  $66.76 \pm 4.09$  % (mean  $\pm$  s.d.) fewer sweeps than  
421 the former. Note that the sweeps were counted at all supra-threshold and two highest  
422 sub-threshold levels. **C** Similar to **A**, matched thresholds in human ABR were  
423 reported by both the algorithm and human judges (maximum and mean discrepancies,  
424 2 dB and  $0.42 \pm 0.83$  dB, mean  $\pm$  s.d.). To illustrate overlapping data points, dots of  
425 different sizes were used. Linear fit: adjust  $R^2 = 1.00$ . **D** The total number of sweeps  
426 used in the conventional level averaging (left bar) vs. in our method (right bar). The  
427 latter requires  $53.08 \pm 12.91$  % (mean  $\pm$  s.d.) fewer sweeps than the former.

428

429 **REFERENCES**

430

431 Alpsan, D., and Ozdamar, O. (1991). Brain-Stem Auditory Evoked-Potential  
432 Classification by Backpropagation Networks. 1991 Ieee International Joint  
433 Conference on Neural Networks, Vols 1-3, 1266-1271.

434 Barreira-Nielsen, C., Fitzpatrick, E., Hashem, S., Whittingham, J., Barrowman, N.,  
435 and Aglipay, M. (2016). Progressive Hearing Loss in Early Childhood. *Ear Hear* 37,  
436 e311-321.

437 Berninger, E., Olofsson, A., and Leijon, A. (2014). Analysis of click-evoked auditory  
438 brainstem responses using time domain cross-correlations between interleaved  
439 responses. *Ear Hear* 35, 318-329.

440 Bershad, N.J., and Rockmore, A.J. (1974). On estimating signal-to-noise ratio using  
441 the sample correlation coefficient. *IEEE Trans Inf Theory IT-20*, 112-113.

442 Bramhall, N.F., Konrad-Martin, D., and McMillan, G.P. (2018). Tinnitus and Auditory  
443 Perception After a History of Noise Exposure: Relationship to Auditory Brainstem  
444 Response Measures. *Ear Hear* 39, 881-894.

445 Castaneda, R., Natarajan, S., Yule Jeong, S., Na Hong, B., and Ho Kang, T. (2019).  
446 Electrophysiological changes in auditory evoked potentials in rats with salicylate-  
447 induced tinnitus. *Brain Res*.

448 Cebulla, M., and Sturzebecher, E. (2015). Automated auditory response detection:  
449 Further improvement of the statistical test strategy by using progressive test steps of  
450 iteration. *Int J Audiol* 54, 568-572.

451 Cebulla, M., Sturzebecher, E., and Wernecke, K.D. (2000). Objective detection of  
452 auditory brainstem potentials: comparison of statistical tests in the time and frequency  
453 domains. *Scand Audiol* 29, 44-51.

454 Davey, R., McCullagh, P., Lightbody, G., and McAllister, G. (2007). Auditory  
455 brainstem response classification: a hybrid model using time and frequency features.  
456 *Artif Intell Med* 40, 1-14.

457 Don, M., and Elberling, C. (1994). Evaluating residual background noise in human  
458 auditory brain-stem responses. *J Acoust Soc Am* 96, 2746-2757.

459 Don, M., and Elberling, C. (1996). Use of quantitative measures of auditory brain-  
460 stem response peak amplitude and residual background noise in the decision to stop  
461 averaging. *The Journal of the Acoustical Society of America* 99, 491-499.

462 Elberling, C. (1979). Auditory electrophysiology. The use of templates and cross  
463 correlation functions in the analysis of brain stem potentials. *Scand Audiol* 8, 187-  
464 190.

465 Elberling, C., and Don, M. (1984). Quality estimation of averaged auditory brainstem  
466 responses. *Scand Audiol* 13, 187-197.

467 Galbraith, G.C., and Brown, W.S. (1990). Cross-correlation and latency compensation  
468 analysis of click-evoked and frequency-following brain-stem responses in man.  
469 *Electroencephalogr Clin Neurophysiol* 77, 295-308.

470 Gates, G.A., and Mills, J.H. (2005). Presbycusis. *Lancet* 366, 1111-1120.

471 Henry, K.R. (1979). Auditory brainstem volume-conducted responses: origins in the  
472 laboratory mouse. *J Am Aud Soc* 4, 173-178.

473 Jewett, D.L., Romano, M.N., and Williston, J.S. (1970). Human auditory evoked  
474 potentials: possible brain stem components detected on the scalp. *Science* 167, 1517-  
475 1518.

476 Kujawa, S.G., and Liberman, M.C. (2009). Adding insult to injury: cochlear nerve  
477 degeneration after "temporary" noise-induced hearing loss. *J Neurosci* 29, 14077-  
478 14085.

- 479 Lewis, J.D., Kopun, J., Neely, S.T., Schmid, K.K., and Gorga, M.P. (2015). Tone-burst  
480 auditory brainstem response wave V latencies in normal-hearing and hearing-  
481 impaired ears. *J Acoust Soc Am* *138*, 3210-3219.
- 482 Lin, X., Li, G., Zhang, Y., Zhao, J., Lu, J., Gao, Y., Liu, H., Li, G.L., Yang, T., Song,  
483 L., *et al.* (2019). Hearing consequences in Gjb2 knock-in mice: implications for  
484 human p.V37I mutation. *Aging (Albany NY)* *11*, 7416-7441.
- 485 Madsen, S.M.K., Harte, J.M., Elberling, C., and Dau, T. (2018). Accuracy of averaged  
486 auditory brainstem response amplitude and latency estimates. *Int J Audiol* *57*, 345-  
487 353.
- 488 McKearney, R.M., and MacKinnon, R.C. (2019). Objective auditory brainstem  
489 response classification using machine learning. *Int J Audiol*, 1-7.
- 490 Mehraei, G., Hickox, A.E., Bharadwaj, H.M., Goldberg, H., Verhulst, S., Liberman,  
491 M.C., and Shinn-Cunningham, B.G. (2016). Auditory Brainstem Response Latency in  
492 Noise as a Marker of Cochlear Synaptopathy. *J Neurosci* *36*, 3755-3764.
- 493 Melcher, J.R., Guinan, J.J., Jr., Knudson, I.M., and Kiang, N.Y. (1996). Generators of  
494 the brainstem auditory evoked potential in cat. II. Correlating lesion sites with  
495 waveform changes. *Hear Res* *93*, 28-51.
- 496 Moller, A.R., and Jannetta, P.J. (1983). Interpretation of brainstem auditory evoked  
497 potentials: results from intracranial recordings in humans. *Scand Audiol* *12*, 125-133.
- 498 Parkkonen, L., Fujiki, N., and Makela, J.P. (2009). Sources of auditory brainstem  
499 responses revisited: contribution by magnetoencephalography. *Hum Brain Mapp* *30*,  
500 1772-1782.
- 501 Ridley, C.L., Kopun, J.G., Neely, S.T., Gorga, M.P., and Rasetshwane, D.M. (2018).  
502 Using Thresholds in Noise to Identify Hidden Hearing Loss in Humans. *Ear Hear* *39*,  
503 829-844.
- 504 Roeser, R.J., Valente, M., and Hosford-Dunn, H. (2007). *Audiology. Diagnosis*, 2nd  
505 edn (New York: Thieme).
- 506 Sergeyenko, Y., Lall, K., Liberman, M.C., and Kujawa, S.G. (2013). Age-related  
507 cochlear synaptopathy: an early-onset contributor to auditory functional decline. *J*  
508 *Neurosci* *33*, 13686-13694.
- 509 Sininger, Y.S. (1993). Auditory brain stem response for objective measures of hearing.  
510 *Ear Hear* *14*, 23-30.
- 511 Suthakar, K., and Liberman, M.C. (2019). A simple algorithm for objective threshold  
512 determination of auditory brainstem responses. *Hear Res* *381*, 107782.
- 513 Valderrama, J.T., de la Torre, A., Alvarez, I., Segura, J.C., Thornton, A.R., Sainz, M.,  
514 and Vargas, J.L. (2014). Automatic quality assessment and peak identification of  
515 auditory brainstem responses with fitted parametric peaks. *Comput Methods*  
516 *Programs Biomed* *114*, 262-275.
- 517 Vidler, M., and Parkert, D. (2004). Auditory brainstem response threshold estimation:  
518 subjective threshold estimation by experienced clinicians in a computer simulation of  
519 the clinical test. *Int J Audiol* *43*, 417-429.
- 520 Weber, B.A., and Fletcher, G.L. (1980). A computerized scoring procedure for  
521 auditory brainstem response audiometry. *Ear Hear* *1*, 233-236.
- 522 Xu, Z.M., De Vel, E., Vinck, B., and Van Cauwenberge, P. (1995). Application of  
523 cross-correlation function in the evaluation of objective MLR thresholds in the low  
524 and middle frequencies. *Scand Audiol* *24*, 231-236.
- 525





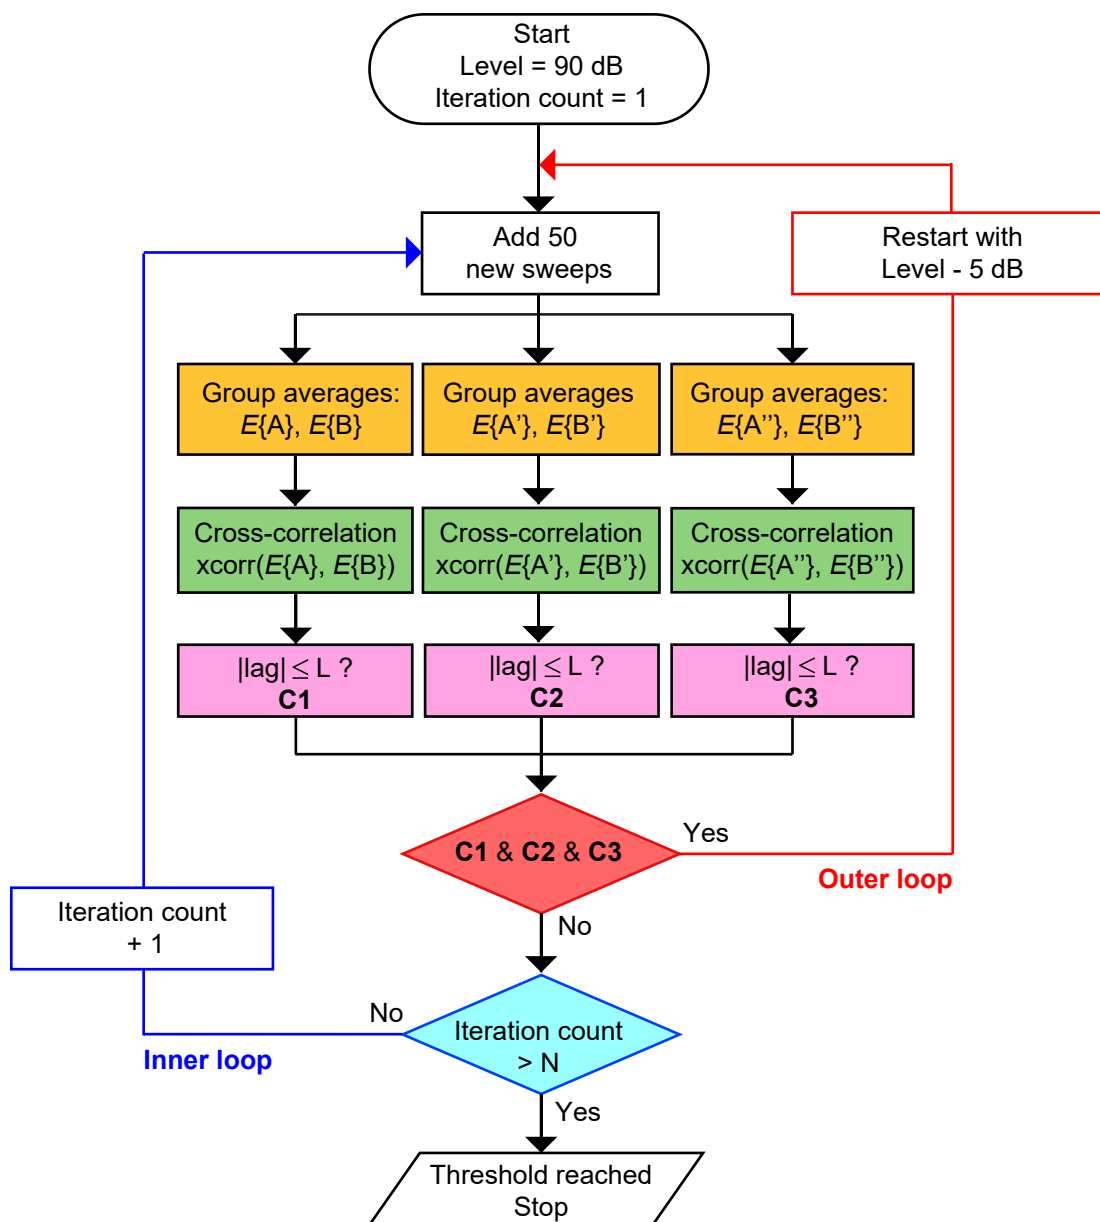

Wang et al., Fig 1

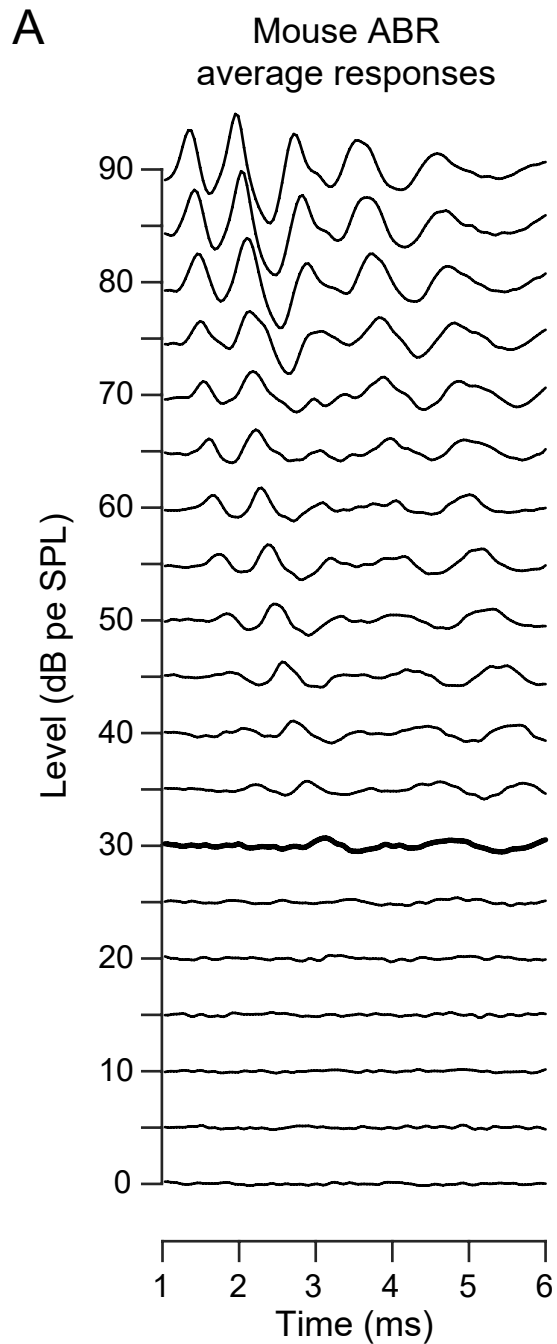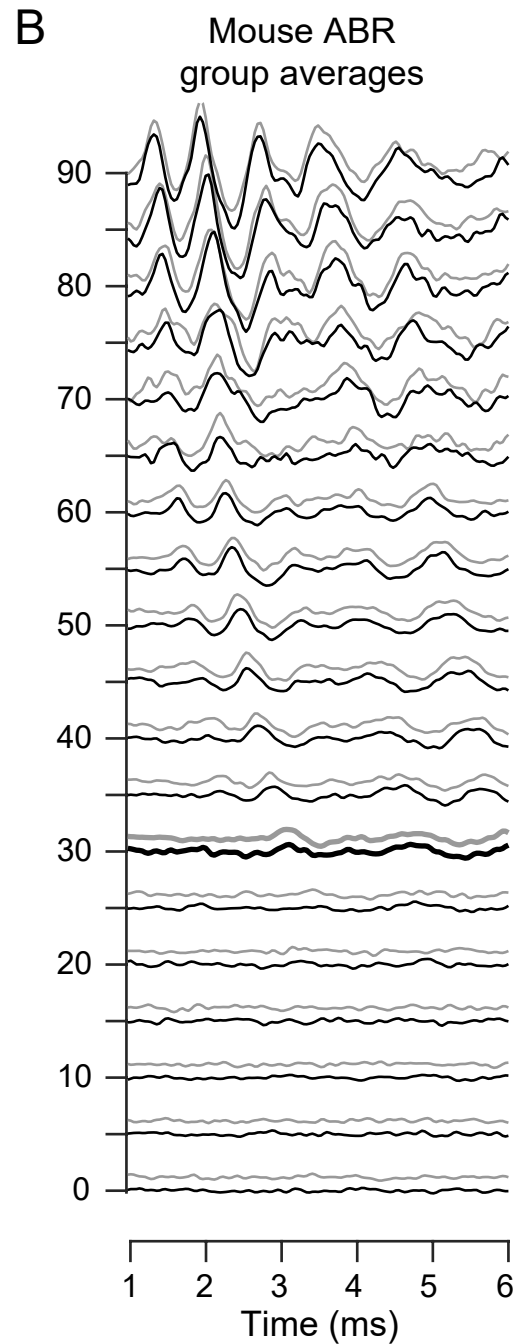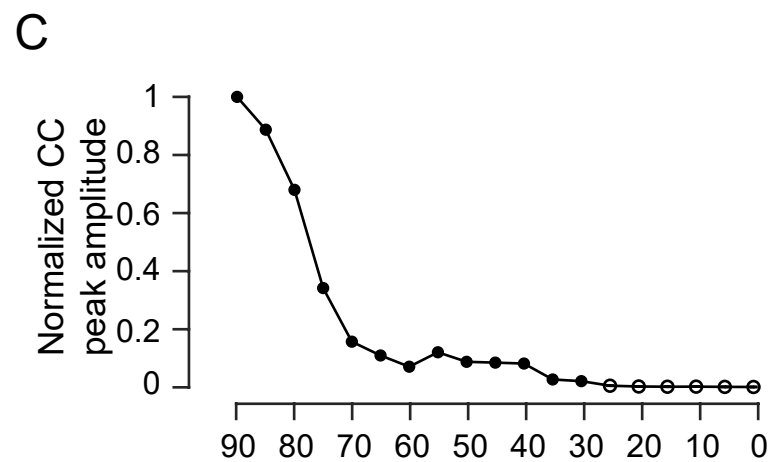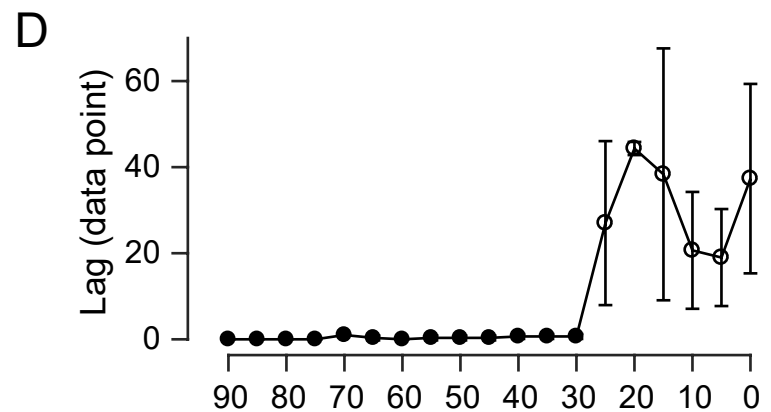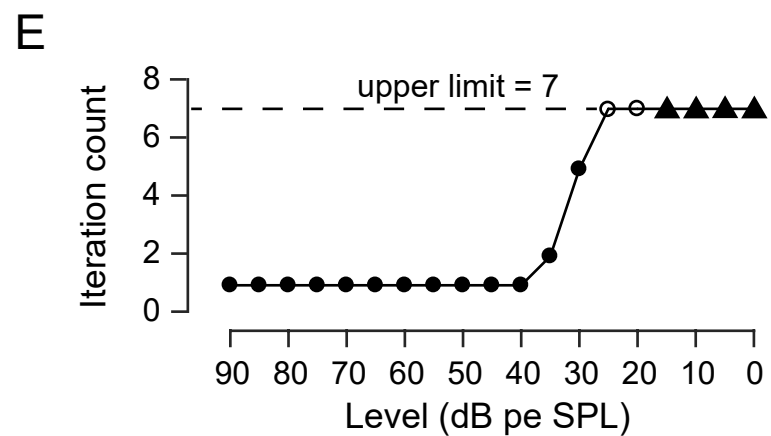

Wang et al., Fig 2

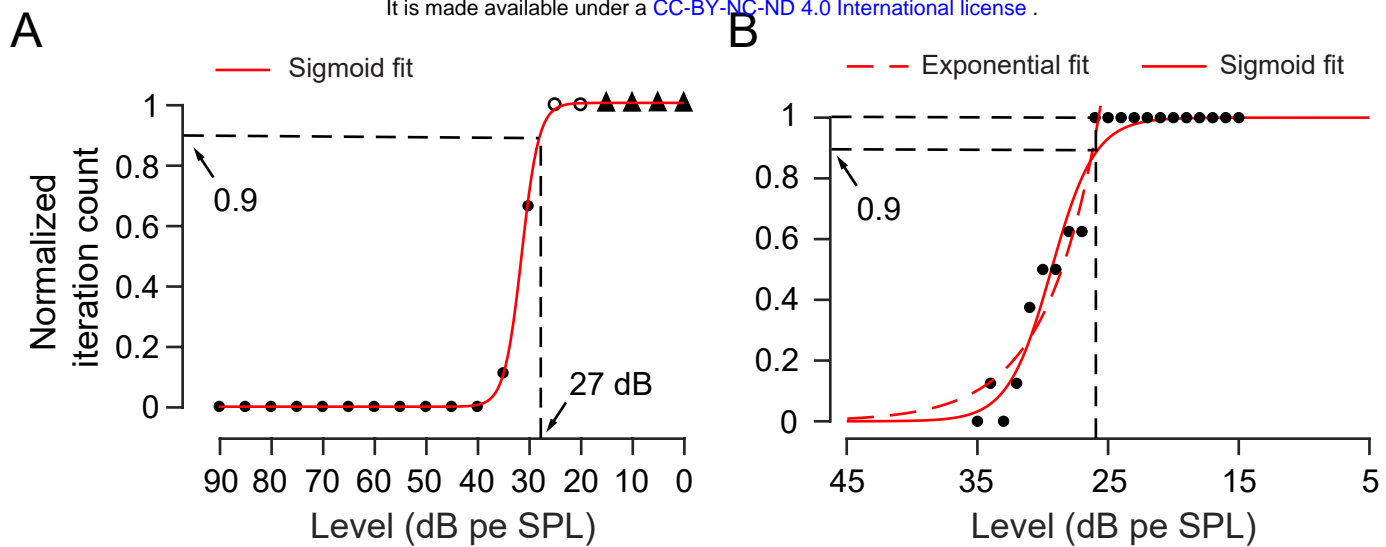

Wang et al., Fig 3

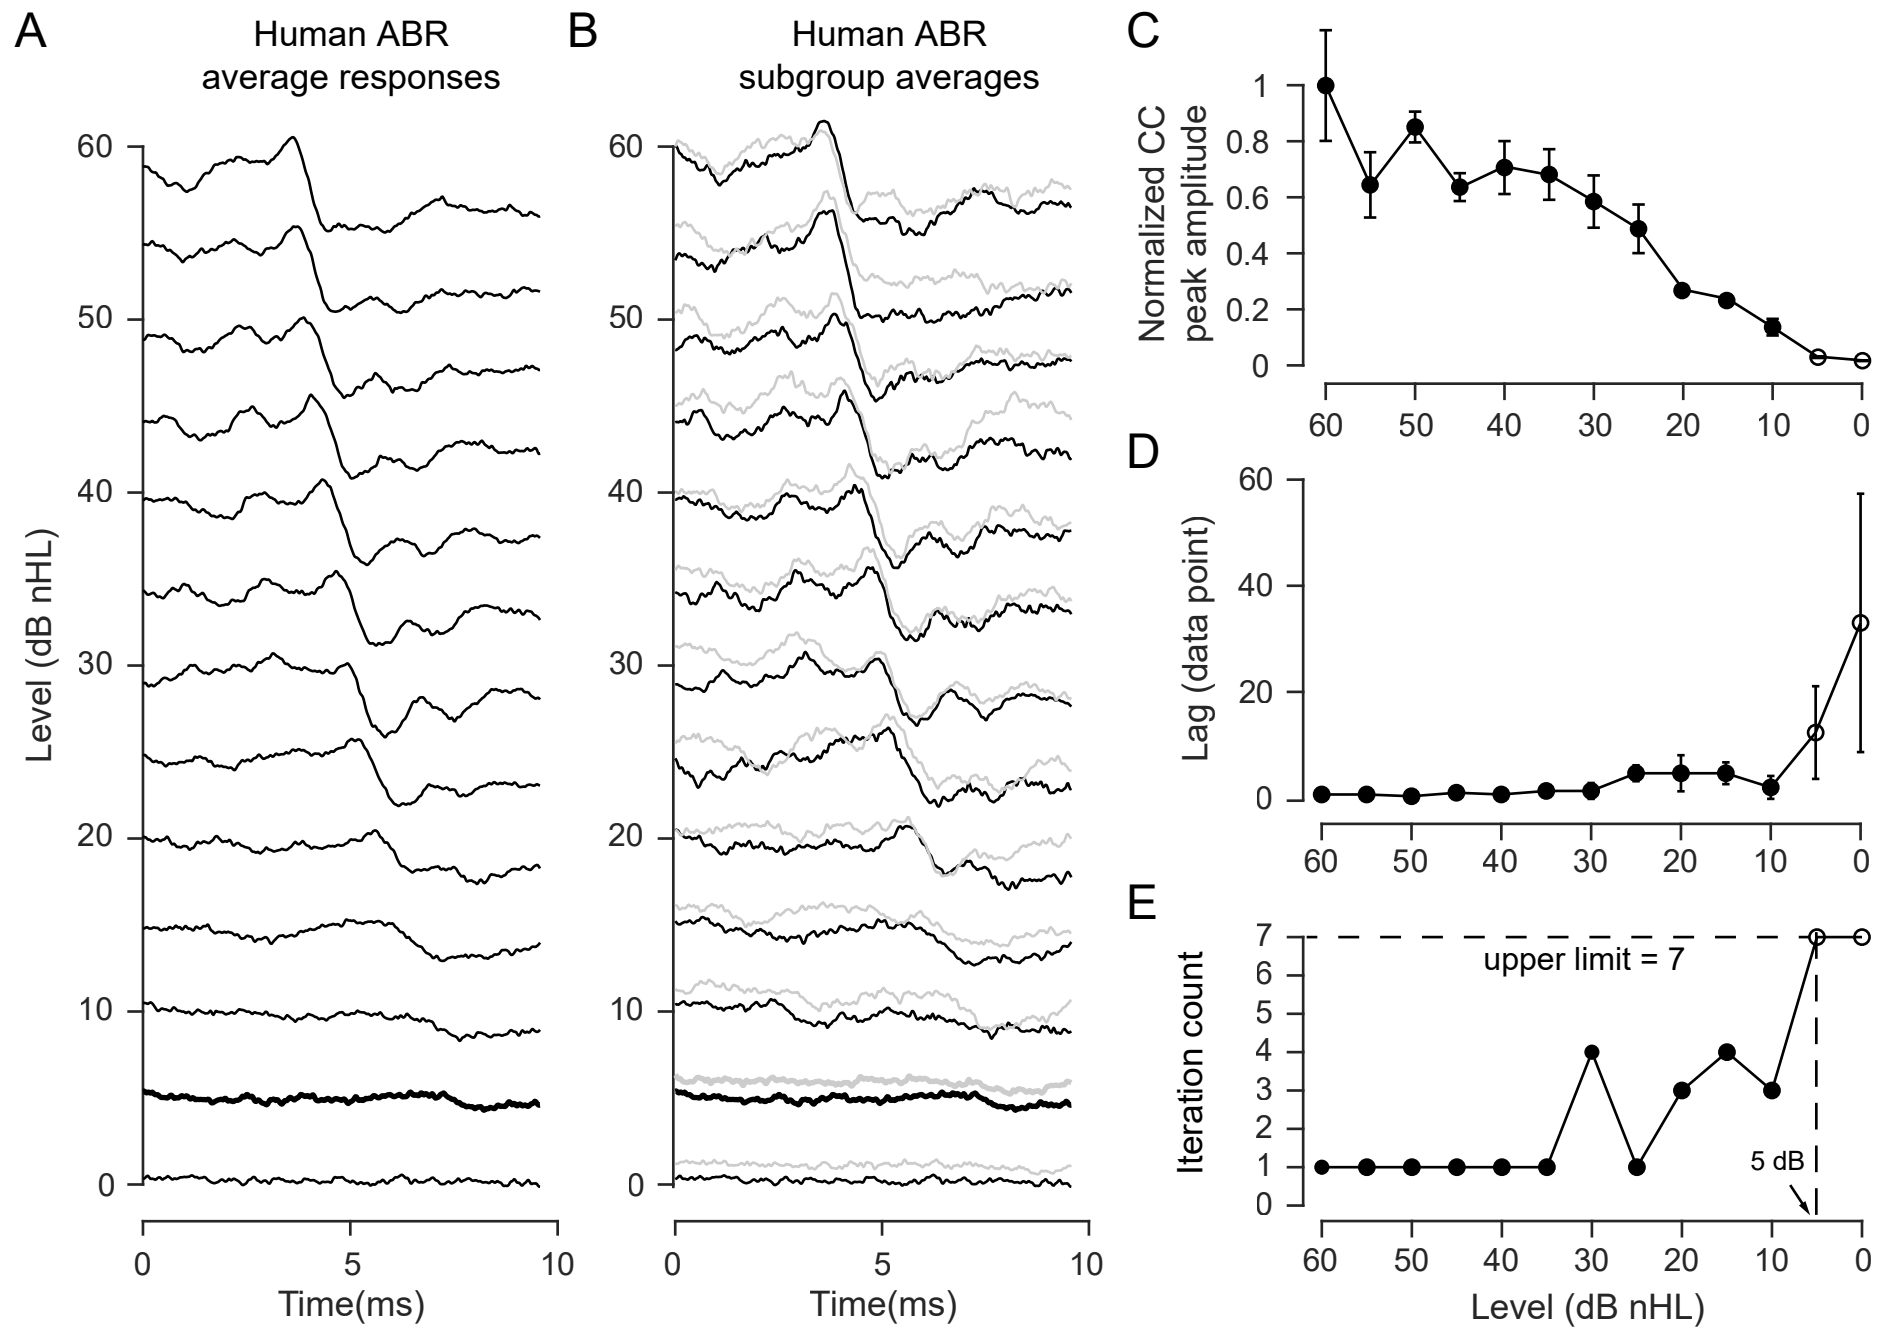

Wang et al., Fig 4

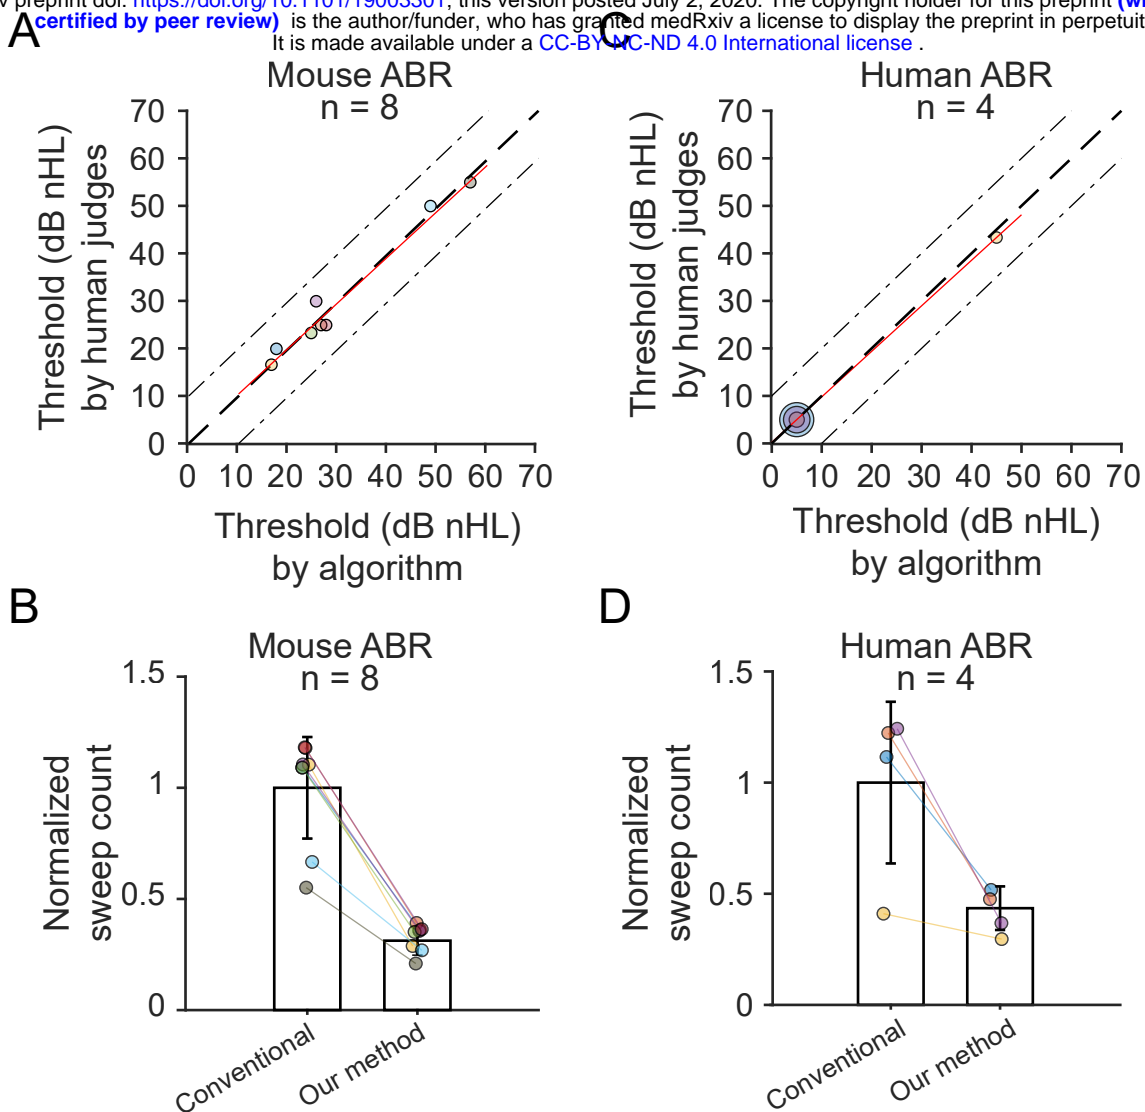

Wang et al., Fig 5
